# Supplementary material for: Adipokines as Predictive Biomarkers for Training Adaptation in Subjects with Multimorbidity—A Hypothesis-Generating Study
Source: MDPI journal article supplement (doi:10.3390/jcm12134376), 2023-06-29
Supplement: s1 [file s1]

Suppl. Figure S1

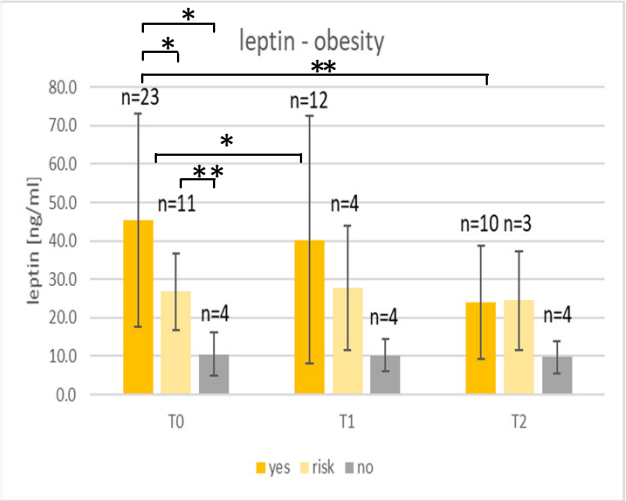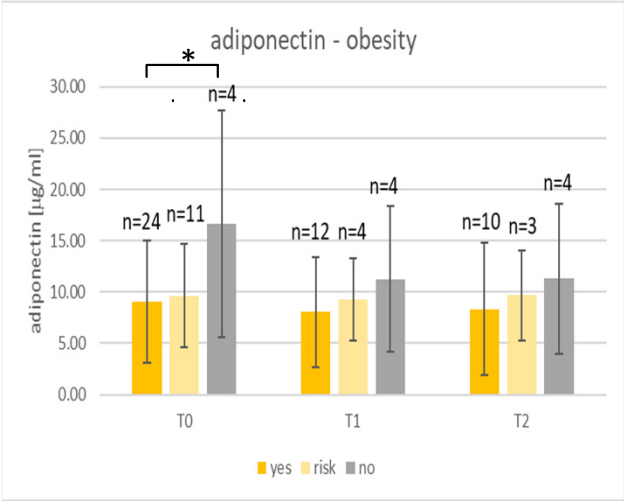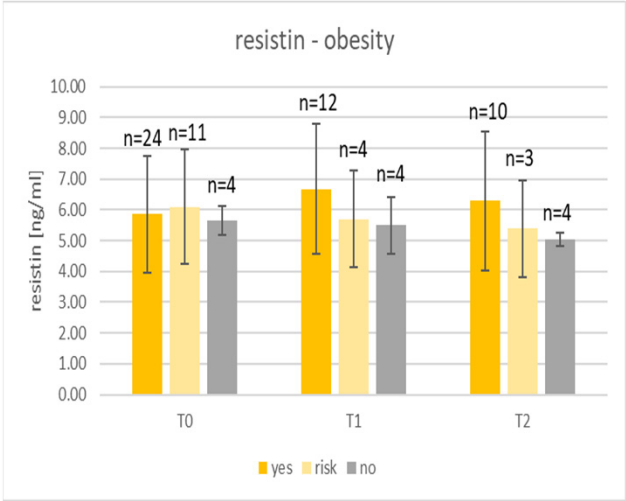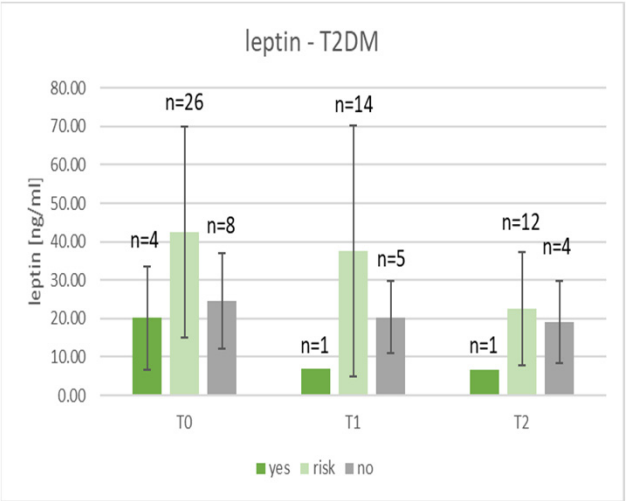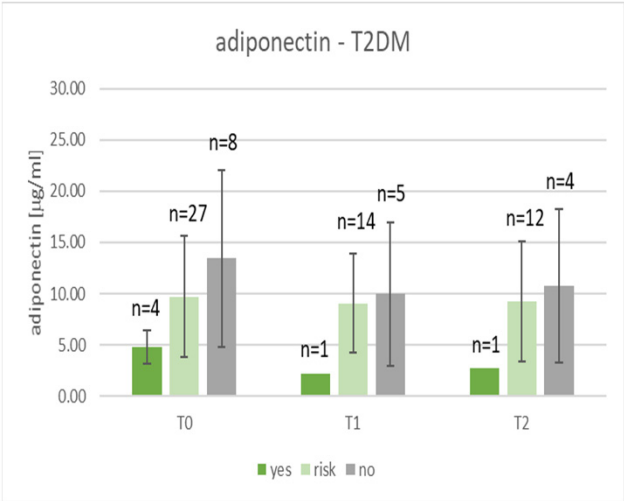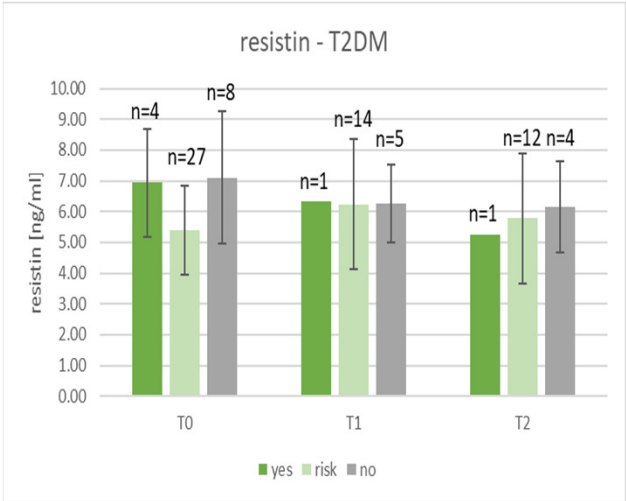

Suppl. Figure S2

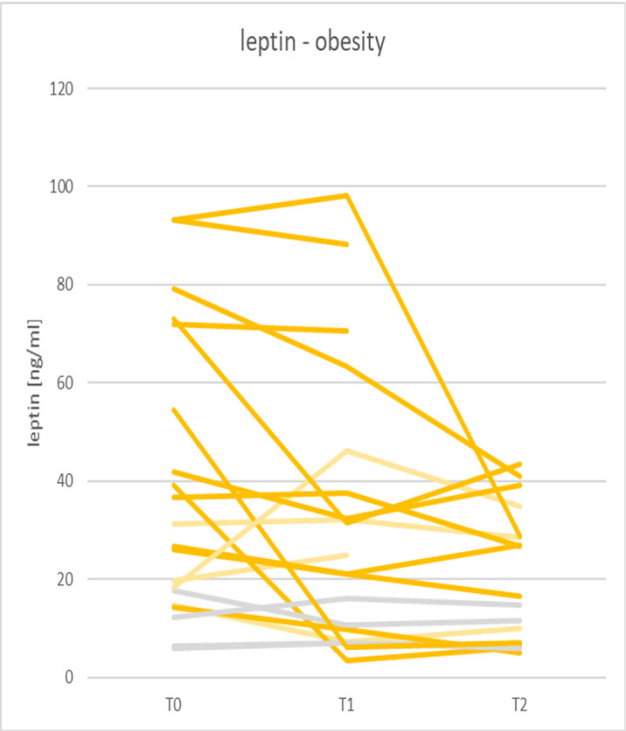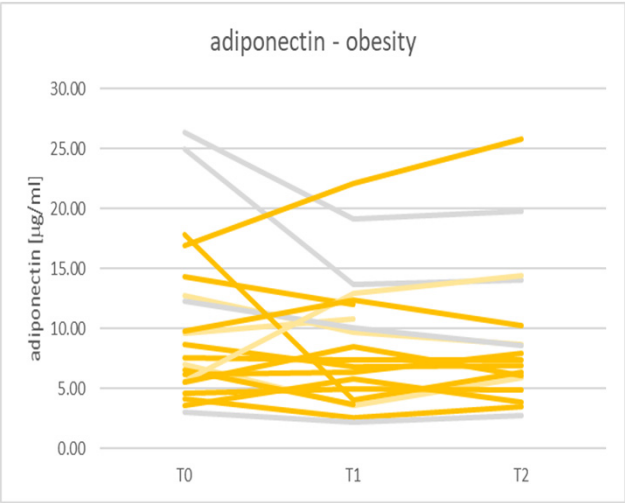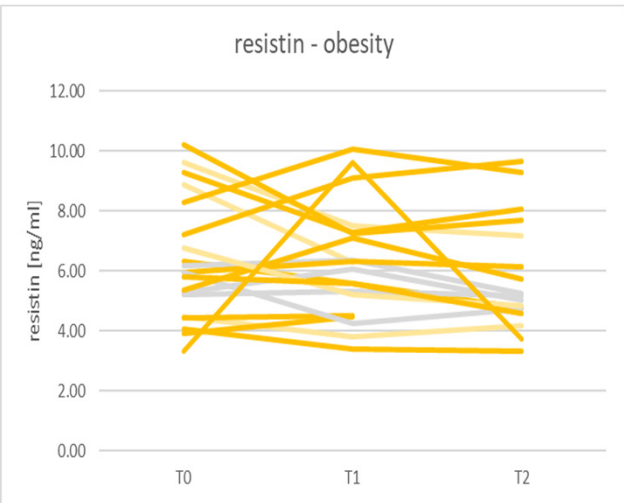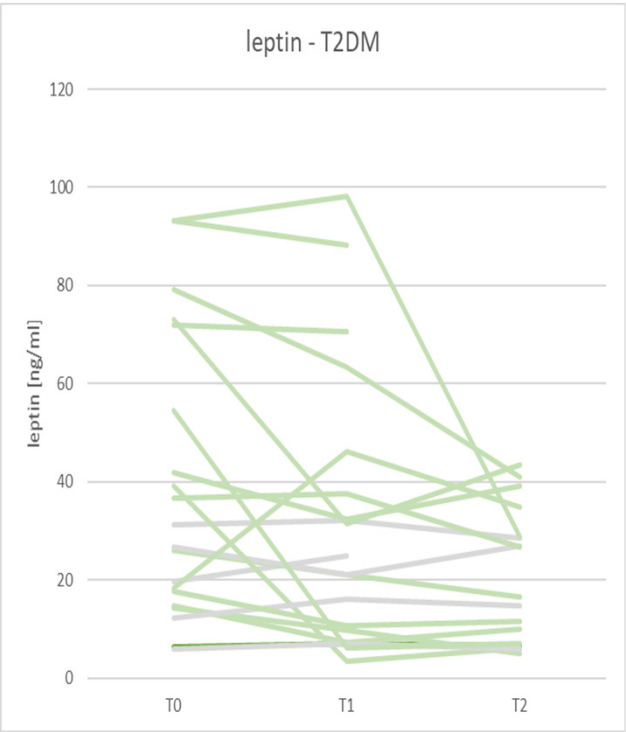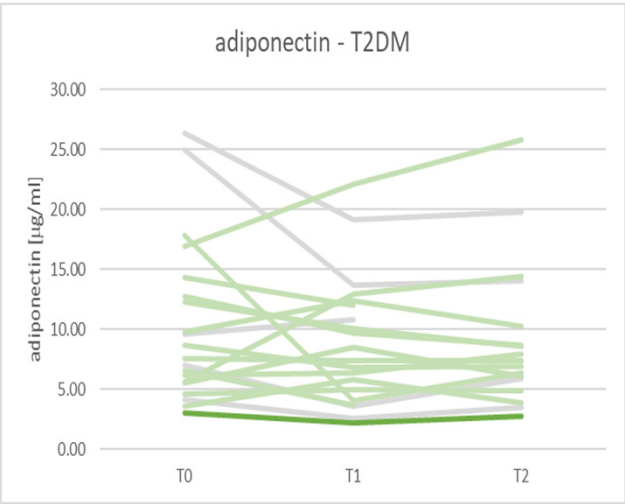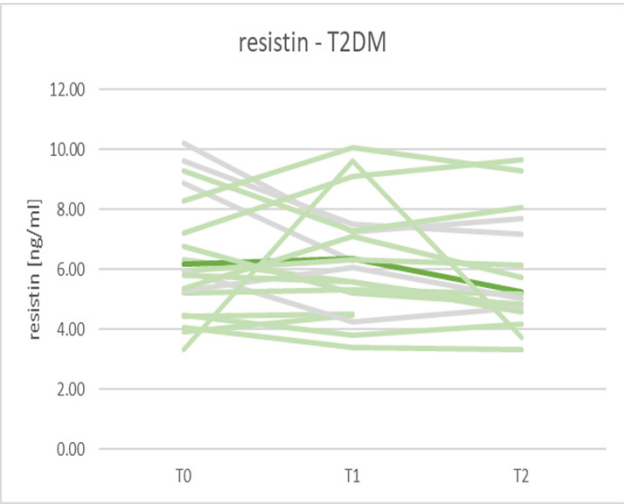

# Suppl. Figure S3

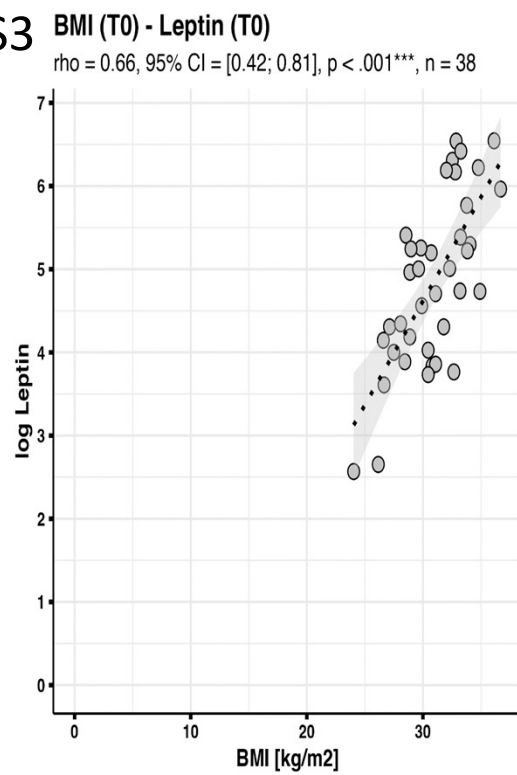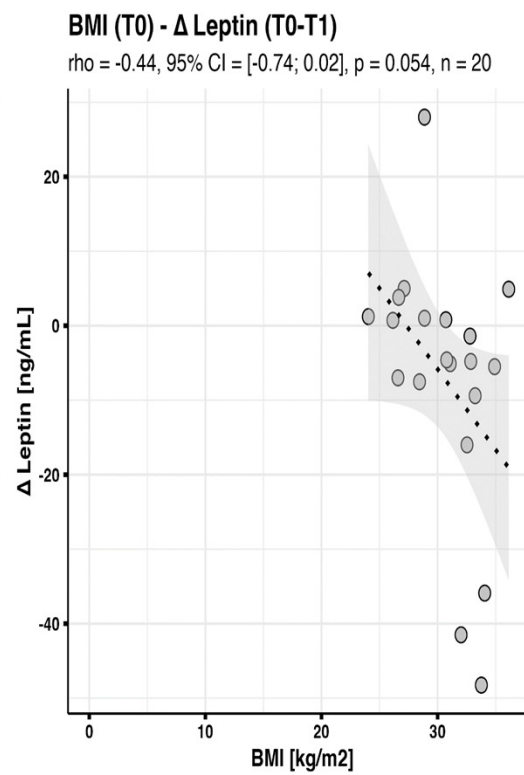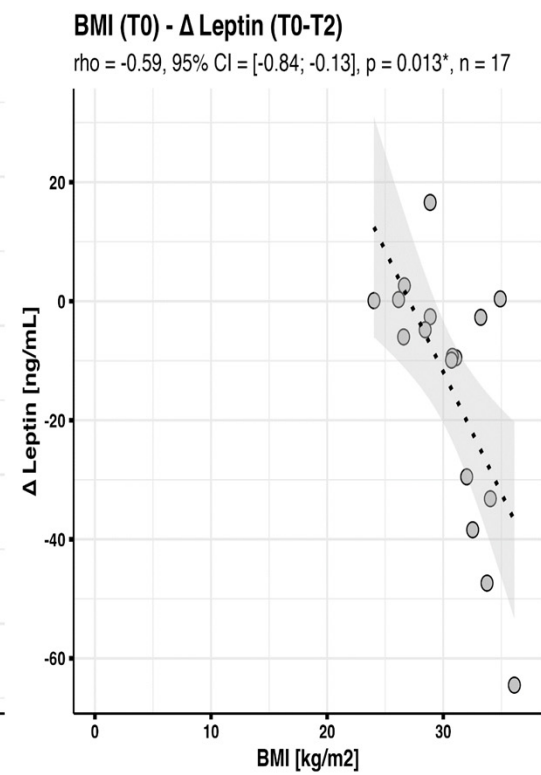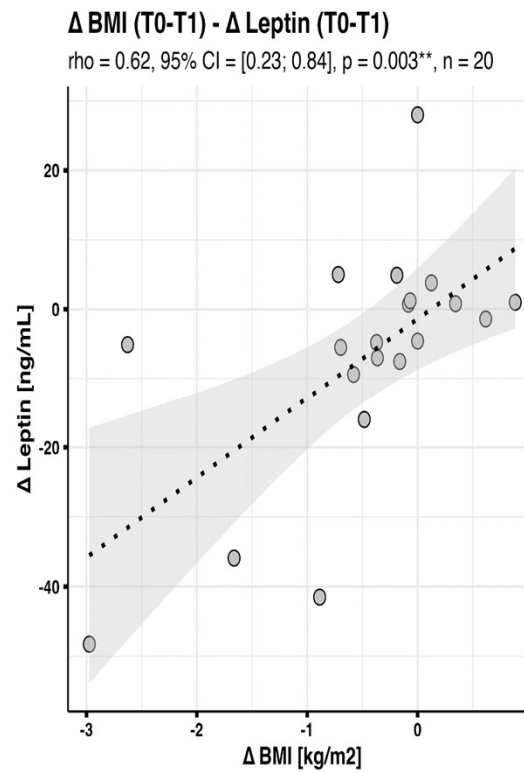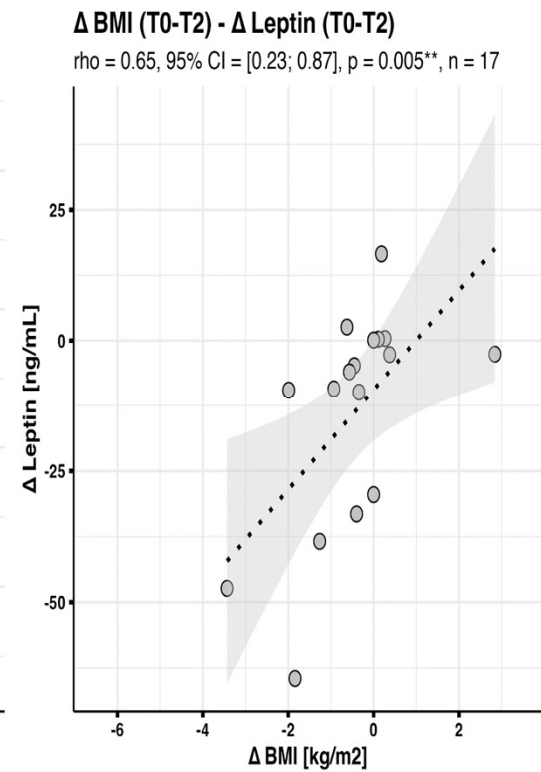

Suppl. Figure S4

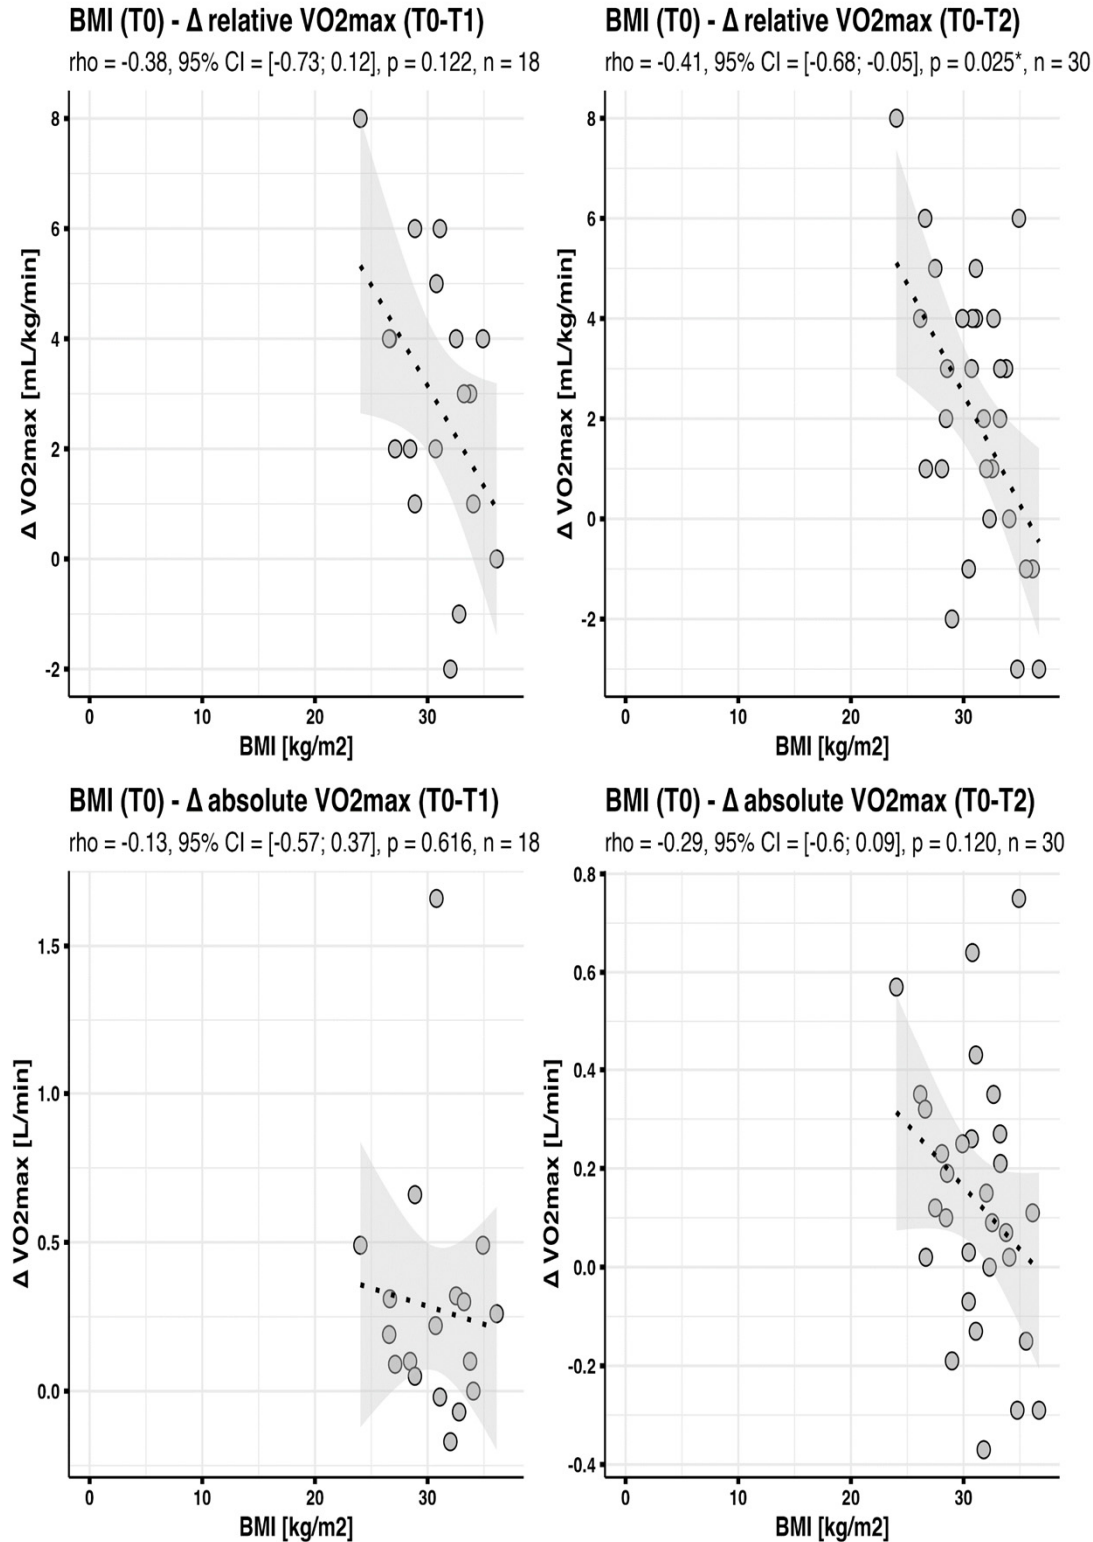

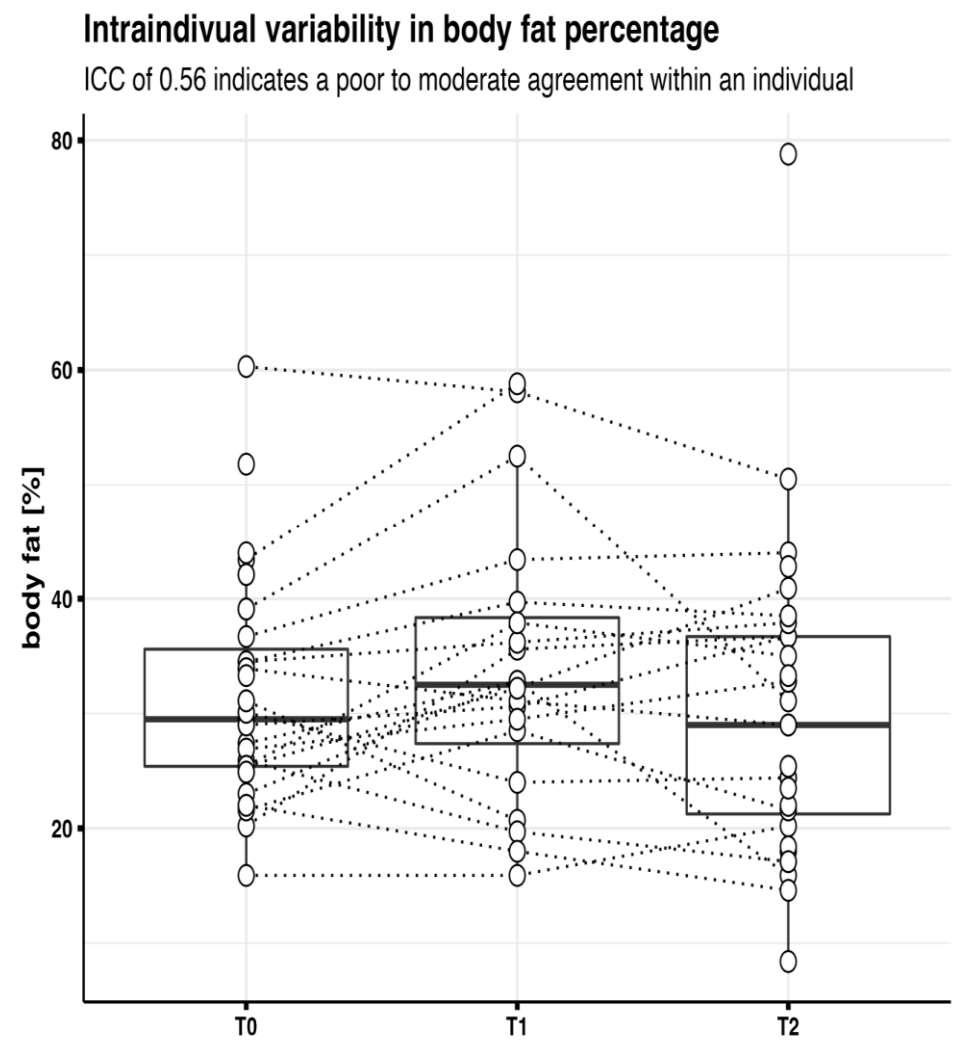

Suppl. Figure S6

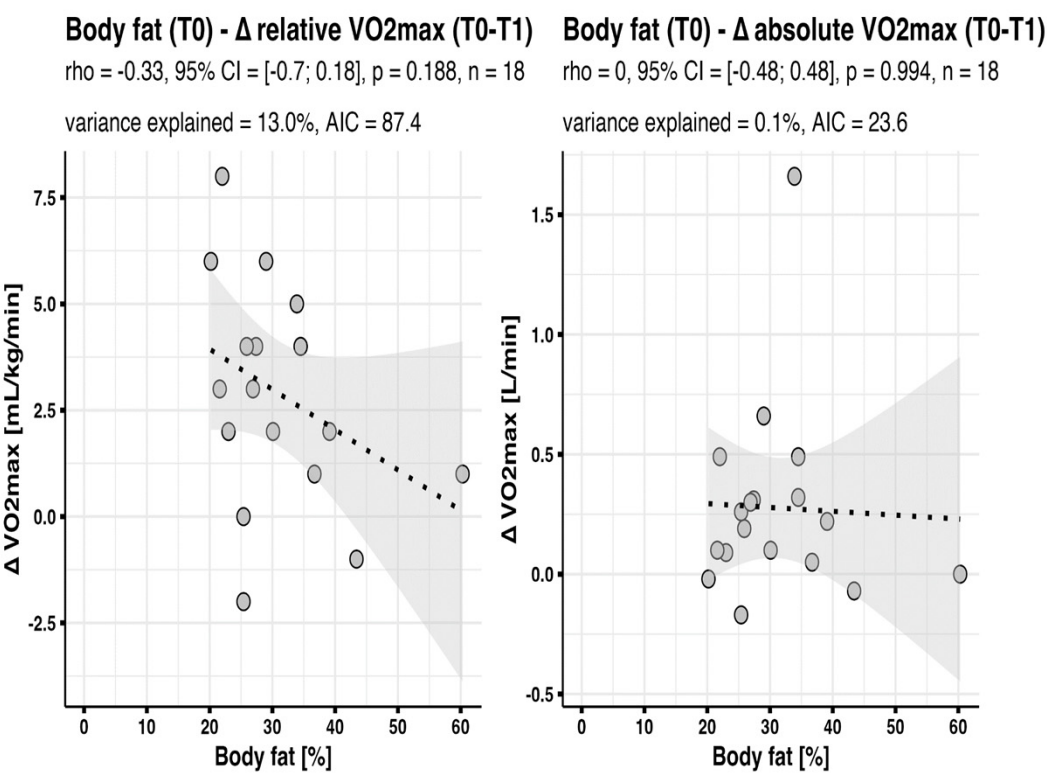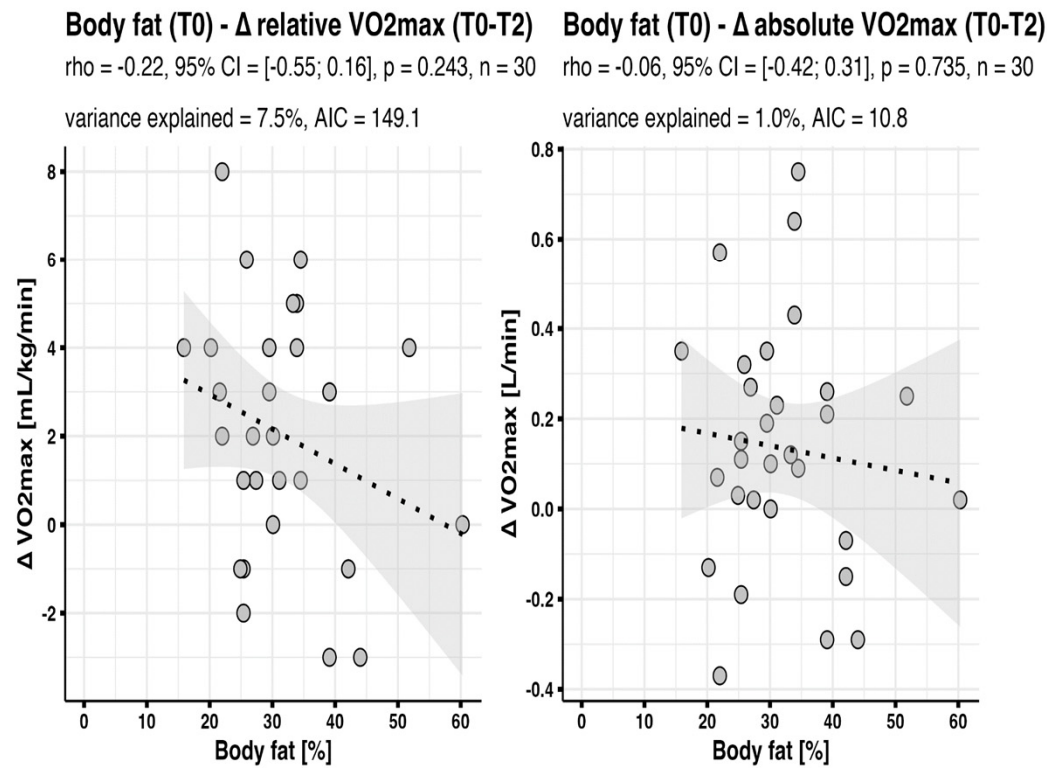

Suppl. Figure S7

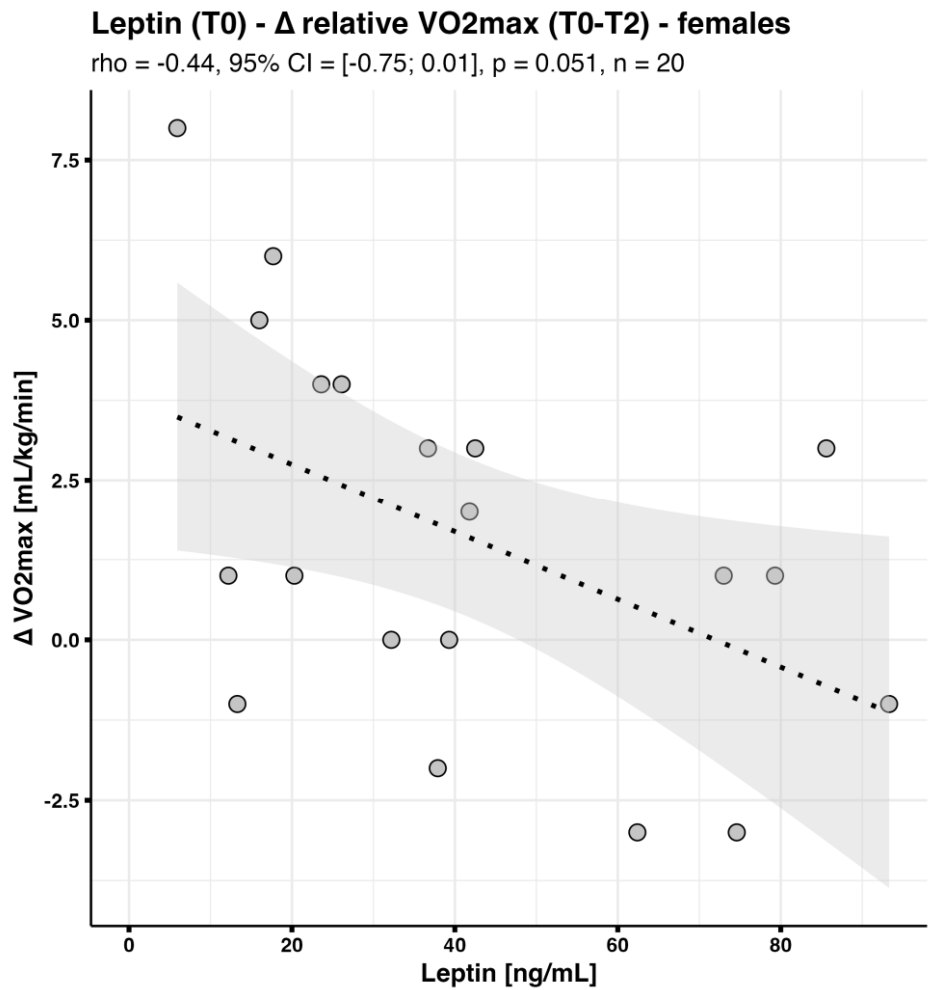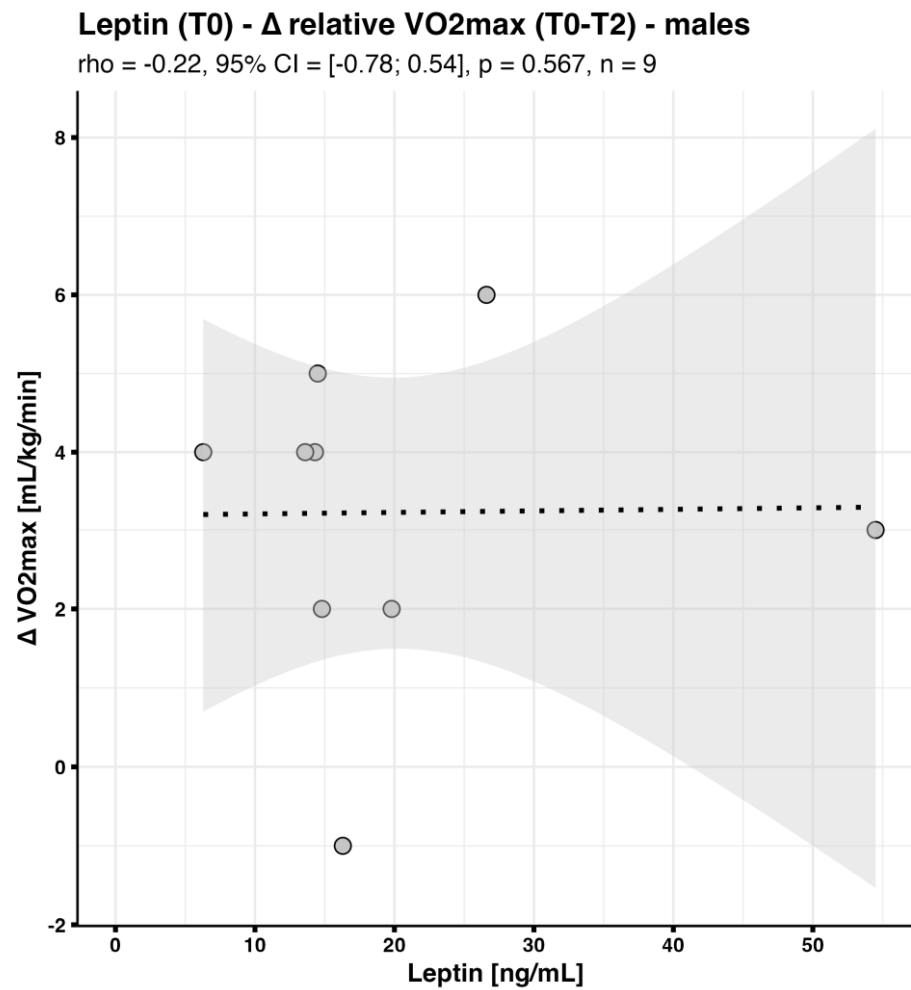

Suppl. Table S1

|           | Body Weight [kg] |      | Body Fat [%] |      | Waist circumference [cm] |      |
|-----------|------------------|------|--------------|------|--------------------------|------|
|           | Mean             | SD   | Mean         | SD   | Mean                     | SD   |
| t0 (n=39) | 90.8             | 12.4 | 31.6         | 9.0  | 110.1                    | 14.1 |
| t3 (n=20) | 88.9             | 14.7 | 34.0         | 12.2 | 106.4                    | 11.6 |
| t6 (n=32) | 89.1             | 13.0 | 30           | 13.3 | 105.3                    | 10.7 |
| n=32      | p= 0.08          |      | p= 0.3       |      | p= 0.08                  |      |
